# Supplementary material for: The kinetics of humoral response and its relationship with the disease severity in COVID-19
Source: PubMed Central journal article supplement (PMC7733479; doi:10.1038/s42003-020-01526-8), 2020-12-11
Supplement: 42003_2020_1526_MOESM2_ESM.pdf [file 42003_2020_1526_MOESM2_ESM.pdf]

## **Description of Additional Supplementary Files**

File Name: Supplementary Data 1

Description: Supplementary Data 1 is about the basic information of patients/samples and antibody levels.

File Name: Supplementary Data 2

Description: Supplementary Data 2 is the source data underlying plots shown in figures.
